# Supplementary material for: Dealcoholized muscadine wine was partially effective in preventing and treating dextran sulfate sodium-induced colitis and restoring gut dysbiosis in mice
Source: Royal Society of Chemistry journal article supplement (doi:10.1039/d3fo00047h), 2023-01-01
Supplement: d3fo00047h1.pdf [file d3fo00047h1.pdf]

Table S1. Nutrition composition of the control diet, DMW, and diet with 2.79% (w/v) DMW

| Ingredients            | Control diet<br>(w/g) | DMW (w/g) | Diet with 2.79% DMW<br>(w/g) |
|------------------------|-----------------------|-----------|------------------------------|
| Casein                 | 140                   | 0.153     | 139.8                        |
| L-Cystine              | 1.8                   | 0         | 1.8                          |
| Corn Starch            | 450                   | 0         | 450.0                        |
| Maltodextrin10         | 125                   | 0         | 125.0                        |
| Fructose               | 24.3                  | 0.208     | 24.1                         |
| Dextrose               | 21.7                  | 0.383     | 21.3                         |
| Sucrose                | 100                   | 0.027     | 100.0                        |
| Cellulose              | 50                    | 0.478     | 49.5                         |
| Soybean oil            | 40                    | 0         | 40.0                         |
| tBHQ                   | 0.008                 | 0         | 0.0                          |
| Mineral Mix<br>S10022M | 35                    | 0.259     | 34.7                         |
| Vitamin Mix<br>V10037  | 10                    | 0         | 10.0                         |
| Choline Bitartrate     | 2.5                   | 0         | 2.5                          |
| DMW/ml                 |                       | 27.9      | 30.4                         |
| FD&C Red Dye<br>#40    |                       |           | 0.1                          |
| Total wet weight/g     |                       |           | 1029.3                       |
| Total dry weight/g     | 1000.308              |           | 1004.7                       |

Table S2. Genes and primers for RT-qPCR

| NCBI ID#      | Sequence Name | Forward primer          | Reverse primer         |
|---------------|---------------|-------------------------|------------------------|
| IL-6          | NM_031168.2   | TGATGGATGCTACCAAAGTGGGA | TCTCTCTGAAGGACTCTGGCTT |
| IL-1 $\beta$  | NM_008361.4   | TGCCACCTTTTGACAGTGATGA  | CATCAGGACAGCCCAGGTCAA  |
| TNF- $\alpha$ | NM_013693.3   | CTGAACTTCGGGGTGATCGGT   | GTTTGCTACGACGTGGGCTA   |
| ZO-1          | NM_009386.2   | CGAGATGCTGGGACTGACCA    | GACGATCAACCGCATTGTC    |
| Occludin      | NM_008756.2   | AGTGAAGAGTACATGGCTGCTG  | CGTCTGTCATAATCTCCCACCA |
| GAPDH         | NM_008084.3   | GGTGAAGGTCGGTGTGAACG    | AATGAAGGGGTCGTTGATGGC  |

Table S3. Content of polyphenols in DMW

| Polyphenols                  | Concentration<br>(mg/mL) |
|------------------------------|--------------------------|
| Delphinidin-3,5-diglucoside  | 1.08 ± 0.01              |
| Cyanidin 3,5-diglucoside     | 1.34 ± 0.03              |
| Petunidin 3,5-diglucoside    | 0.99 ± 0.05              |
| Pelargonidin 3,5-diglucoside | 0.15 ± 0.01              |
| Peonidin 3,5-diglucoside     | 1.66 ± 0.01              |
| Malvidin 3,5-diglucoside     | 0.075 ± 0.05             |
| Total anthocyanins           | 5.97 ± 0.14              |
| Myricetin                    | 6.95 ± 0.26              |
| Quercetin                    | 1.91 ± 0.09              |
| Kaempferol                   | 0.79 ± 0.05              |
| Ellagic acid                 | 1.15 ± 0.13              |
| Gallic acid                  | 25.60 ± 1.57             |
| Total other polyphenols      | 36.39 ± 1.93             |

Data are mean ± SD of triplicate tests.

Table S4A. Pairwise-PERMANOVA results based on Bray-Curtis dissimilarity

| Groups                  | Permutations | F      | p-value |
|-------------------------|--------------|--------|---------|
| Healthy vs Colitis      | 999          | 13.042 | 0.001   |
| Healthy vs Prevention   | 999          | 8.6586 | 0.001   |
| Healthy vs P+T          | 999          | 6.0471 | 0.001   |
| Healthy vs Treatment    | 999          | 6.4083 | 0.001   |
| Colitis vs Prevention   | 999          | 1.4026 | 0.215   |
| Colitis vs P+T          | 999          | 3.7006 | 0.004   |
| Colitis vs Treatment    | 999          | 1.2825 | 0.284   |
| Prevention vs P+T       | 999          | 1.5446 | 0.166   |
| Prevention vs Treatment | 999          | 1.2393 | 0.292   |
| P+T vs Treatment        | 999          | 1.5711 | 0.153   |

Table S4B. Pairwise-PERMANOVA results based on Unweighted UniFrac distance

| Groups                  | Permutations | F      | p-value |
|-------------------------|--------------|--------|---------|
| Healthy vs Colitis      | 999          | 8.5341 | 0.001   |
| Healthy vs Prevention   | 999          | 6.5331 | 0.002   |
| Healthy vs P+T          | 999          | 5.3748 | 0.002   |
| Healthy vs Treatment    | 999          | 5.9474 | 0.001   |
| Colitis vs Prevention   | 999          | 0.9435 | 0.498   |
| Colitis vs P+T          | 999          | 2.0835 | 0.01    |
| Colitis vs Treatment    | 999          | 1.4299 | 0.109   |
| Prevention vs P+T       | 999          | 1.6902 | 0.066   |
| Prevention vs Treatment | 999          | 1.3278 | 0.189   |
| P+T vs Treatment        | 999          | 1.3294 | 0.14    |

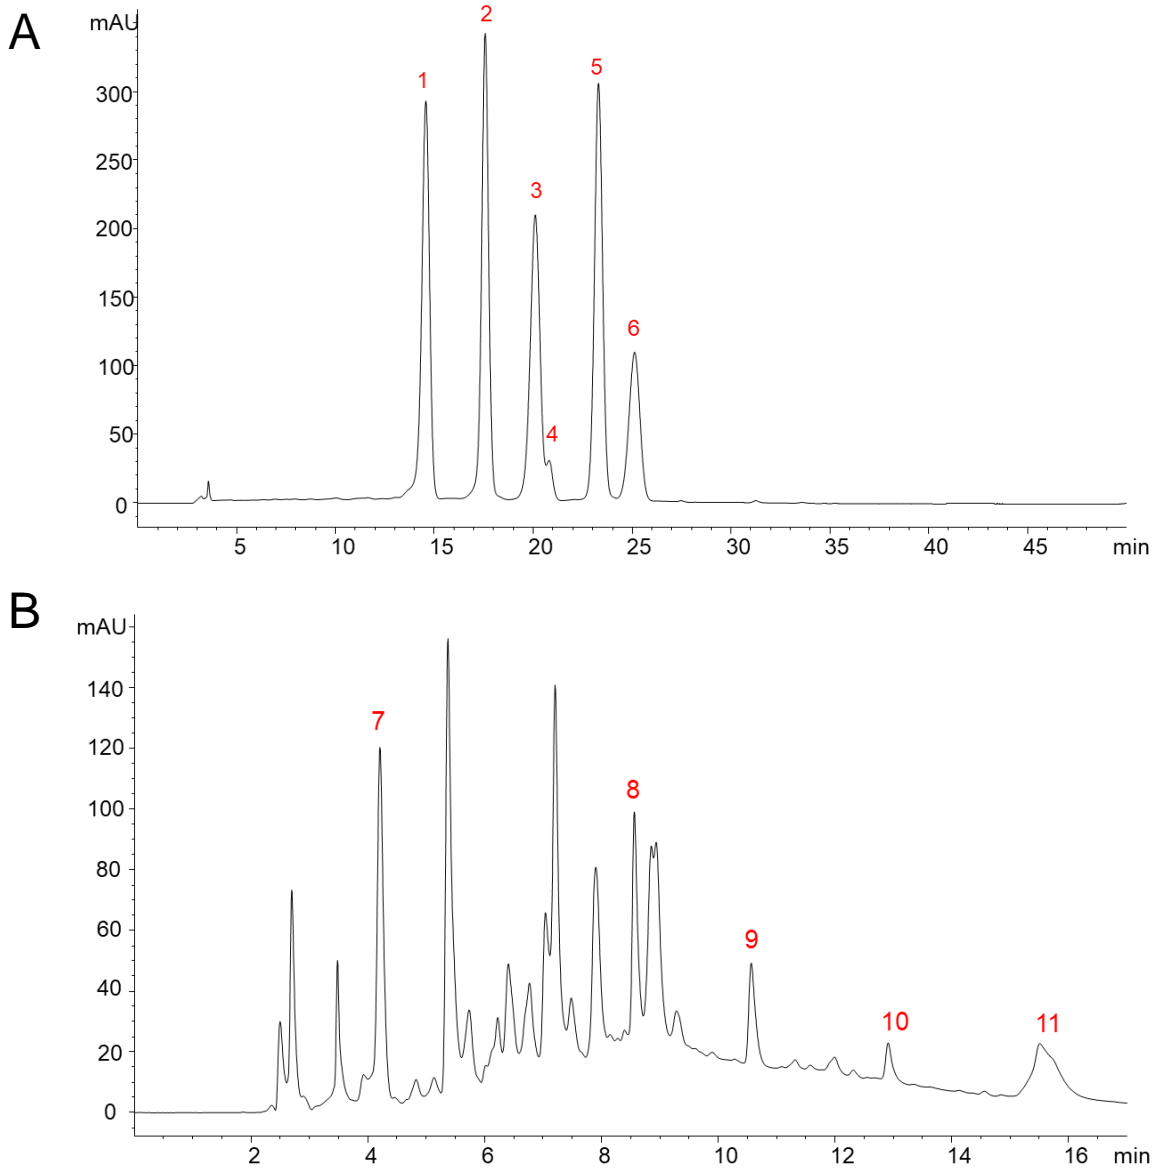

**Figure S1:** HPLC chromatogram of anthocyanins (A) and other polyphenols (B) in DMW using 520 nm and 260 nm detection, respectively. Peaks 1, 2, 3, 4, 5 and 6 in panel A are delphinidin-3,5-diglucoside, cyanidin-3,5-diglucoside, petunidin-3,5-diglucoside, pelargonidin-3,5-diglucoside, peonidin-3,5-diglucoside and malvidin-3,5-diglucoside, respectively. Peaks 7, 8, 9, 10, and 11 in panel B are gallic acid, ellagic acid, myricetin, quercetin, and kaempferol, respectively.

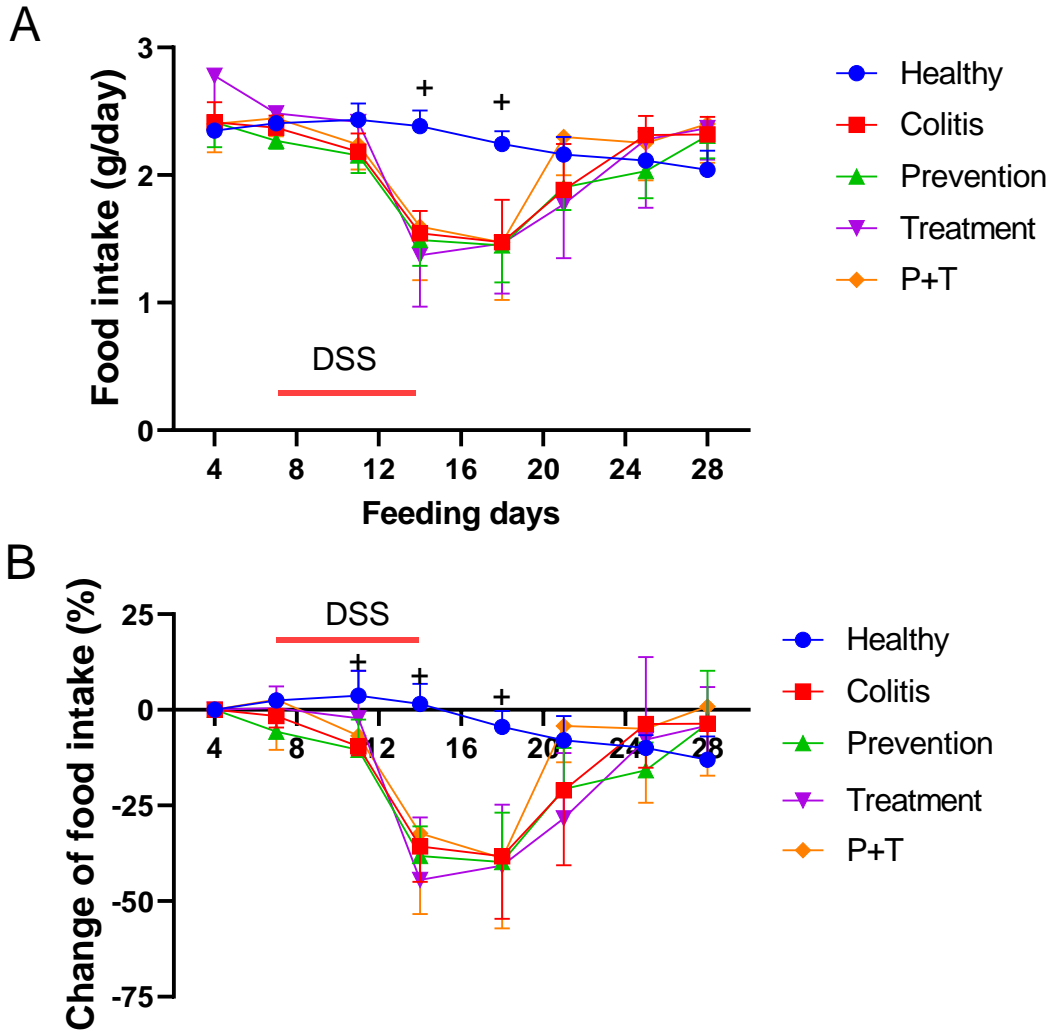

**Figure S2.** Food intake (A) and Change of food intake % (B) in different groups. Data were mean  $\pm$  standard deviation for 4 cages per group. +,  $p < 0.05$  in Healthy vs Colitis; #,  $p < 0.05$  in Prevention vs Colitis; \*,  $p < 0.05$  in P+T vs Colitis; ^,  $p < 0.05$  in Treatment vs Colitis.

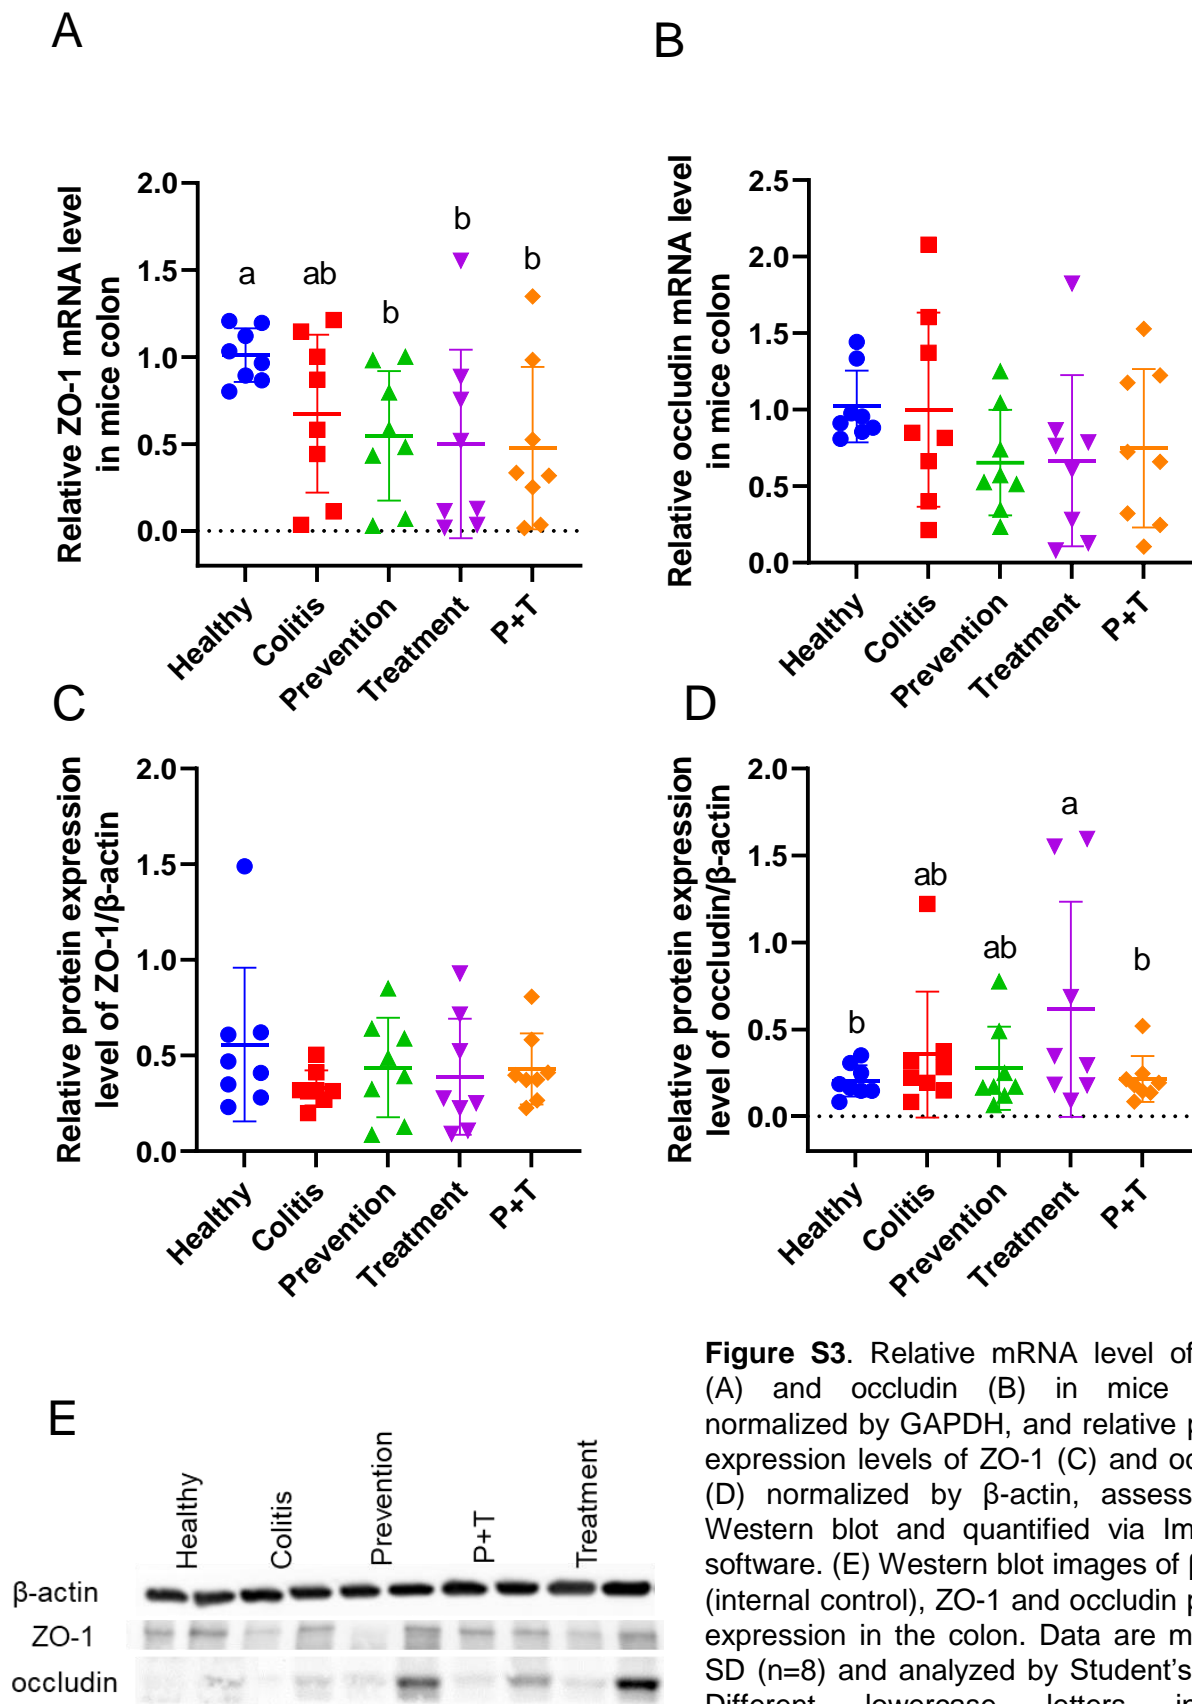

**Figure S3.** Relative mRNA level of ZO-1 (A) and occludin (B) in mice colon, normalized by GAPDH, and relative protein expression levels of ZO-1 (C) and occludin (D) normalized by  $\beta$ -actin, assessed by Western blot and quantified via Image J software. (E) Western blot images of  $\beta$ -actin (internal control), ZO-1 and occludin protein expression in the colon. Data are mean  $\pm$  SD ( $n=8$ ) and analyzed by Student's t-test. Different lowercase letters indicate significant differences among groups.
